# Supplementary material for: In Whose Best Interest? Parental Hesitancy toward the COVID-19 Vaccine for Children in Japan: A Literature Survey Study
Source: MDPI journal article supplement (doi:10.3390/covid2070060), 2022-06-23
Supplement: s1 [file s1]

Archive with 2 entries (2 files):
- Supplimentary File S1 (vaccine voucher).pdf
- Supplimentary File S2 (literature list).xlsx
