# Supplementary material for: In Whose Best Interest? Parental Hesitancy toward the COVID-19 Vaccine for Children in Japan: A Literature Survey Study
Source: MDPI journal article supplement (doi:10.3390/covid2070060), 2022-06-23
Supplement: s1 [file s1 › Supplimentary File S1 (vaccine voucher).pdf]

# For Children Aged 5 to 11 and their Parents or Guardians

## What You Need to Know About COVID-19 Vaccination

Vaccination is Free of Charge  
(Fully Government Subsidized)

Children aged 5 and over are now eligible to receive COVID-19 vaccination.

Please read this brochure and talk about getting vaccinated with your family.

Please remember to bring your Maternal and Child Health Handbook with you to the vaccination.

Page 2

To Parents and Guardians,

**Children aged 5 to 11 are now eligible to receive COVID-19 vaccination.**

**Children account for a growing percentage of the total number of COVID-19 infections nationwide.**

**Please read this brochure and discuss with your child whether or not they should get vaccinated.**

### About this Vaccine:

Vaccinations are administered using a COVID-19 vaccine manufactured by Pfizer specifically for children aged 5 to 11.\*  
Normally, vaccinations are given **in two doses spaced 3 weeks apart**.

\* This vaccine contains 1/3 of the active ingredients of the Pfizer vaccine for those aged 12 and older.

### Who this Vaccine is for:

- Children aged between 5 and 11
- This vaccine is especially recommended for children with underlying medical conditions, such as chronic respiratory conditions, congenital heart defects, and other diseases for which there is a high risk of developing severe COVID-19 symptoms.\* Please consult your family physician before having your child vaccinated.

\* The Japan Pediatric society has released a list of conditions that can lead to severe symptoms arising from COVID-19 infection. For more information, please access the following link. Japan Pediatric Society [Information on COVID-19]  
URL: [https://www.jpeds.or.jp/modules/activity/index.php?content\\_id=333](https://www.jpeds.or.jp/modules/activity/index.php?content_id=333)

### About the **Effects** of the COVID-19 Vaccine

Q: What kind of effects does the COVID-19 vaccine have?

**A: Those who receive the vaccine have a reduced risk of developing symptoms in the event that they are infected with COVID-19.**

When you receive the vaccine, your body develops a mechanism to fight COVID-19 (immunity). This means that if the virus enters the body, the body is ready to fight it immediately, making symptoms of COVID-19 infection less likely to occur. The vaccine is reported to be 90.7% effective in preventing symptoms of the disease in 5-11 year olds, 7 days after receiving the second dose.\*

\* This data was generated before the Omicron variant was discovered.

Source: Reports Concerning Specially Approved Pharmaceuticals

### About the **Safety** of the COVID-19 Vaccine

Q: What side effects will my child experience after receiving the COVID-19 vaccine?

**A: The most common side effect is pain at the site of injection.**

The most commonly experienced side effect is pain at the injection site for a few days after receiving vaccination, with 74% of people experiencing pain after the 1st dose and 71% after the second. Most people experience pain on the night

of the vaccination or the following day, rather than immediately after the injection. Fever and fatigue are more common after the second dose of the vaccine. Only 2.5% of people had a fever of 38°C or higher after the first dose, while 6.5% had a fever after the second dose. Most of the side effects of the vaccine are mild to moderate. Based on the information available at this time, no serious safety concerns have been identified.

#### Side Effects Your Child May Experience For a Few Days After Vaccination

| Percent of People Experiencing Side Effects | Side Effect                                                                  |
|---------------------------------------------|------------------------------------------------------------------------------|
| Over 50%                                    | Pain at the site of injection, fatigue                                       |
| 10 – 50%                                    | Headache, redness and swelling at the site of injection, muscle pain, chills |
| 1 – 10%                                     | Diarrhea, fever, joint pain, vomiting                                        |

Source: Reports Concerning Specially Approved Pharmaceuticals

Q. I've heard that adolescent boys are at risk of developing myocarditis (inflammation of the heart) after vaccination, but what about children?

**A. In the US, myocarditis is reported less frequently in boys between the ages 5 and 11 than in 12 to 17 year-old boys.**

Although extremely rare, cases of mild myocarditis have been reported in children in other countries. In the US, the reported rate of myocarditis following the COVID-19 vaccine is lower among boys aged 5 to 11 years than among boys aged 12 to 17 years. If your child experiences chest pain, palpitations, shortness of breath, swelling, or other symptoms in the 3 or 4 days following vaccination, promptly seek medical attention and inform the physicians that he or she has received the vaccine.

A diagnosis of myocarditis generally requires hospitalization, but in most cases, bedrest is sufficient for recovery.

Source: 2022.1.5 ACIP Meeting

Page 3

To Parents and Guardians

#### How Do I Get My Child Vaccinated?

**© The consent of a parent or guardian is required for the vaccination of children. Parents and guardians are also required to accompany their children during vaccination.**

We ask that parents/guardians make a decision about receiving the vaccine based on a sound knowledge of both the vaccine's benefits for preventing infectious diseases and the risks of side effects. Please be aware that children cannot receive vaccinations without the consent of a parent or guardian.

We also ask that you do not attempt to force your family and loved ones to receive the vaccine, or discriminate against those who have not been vaccinated.

**© If possible, please bring your Maternal and Child Health Handbook on the day of your child's vaccination appointment.**

Child vaccinations are recorded in the Maternal and Child Health Handbook, so if possible, please bring it with you on the day of your child's vaccination appointment.

In addition, please also be sure to bring all the accompanying documents included with this notice, as well as an approved form of identification (e.g., My Number Card, health insurance card, etc.).

**© Please talk to your family doctor or pediatrician if you have questions or concerns about vaccination.**

Please consult your family doctor or pediatrician about when your child should take the COVID-19 vaccine if they are scheduled to receive other vaccines. As a general rule, no other vaccines should be administered for two weeks before and after the COVID-19 vaccine. In addition, if you have any questions or concerns about vaccinating a child with underlying medical conditions, please consult your family doctor or pediatrician.

#### Who to Contact for More Information

**© Who to contact about COVID-19 vaccinations:**

|                                                                                          |                                                                                                                                                   |
|------------------------------------------------------------------------------------------|---------------------------------------------------------------------------------------------------------------------------------------------------|
| If your child experiences any physical or psychological symptoms after being vaccinated→ | Contact the medical institution where the vaccine was administered, your family doctor/pediatrician, or governmental COVID-19 information centers |
| For general inquiries about COVID-19 vaccinations→                                       | Contact your municipal COVID-19 information center                                                                                                |

### © About the Relief System for Injury to Health with Vaccination

It is possible for vaccination to adversely impact one's health (e.g., cause illness or lingering disability). Although such events are extremely rare, there is a relief system in place because the risk cannot be entirely eliminated.

In the case that your child's health has been adversely impacted by the COVID-19 vaccine, relief (medical expenses, disability pension benefits, etc.) is available under the Immunization Act.\* Please consult with the municipality in which you reside regarding the necessary procedures for application.

\* If the Minister of Health, Labour and Welfare determines that the damage to your child's health was caused by vaccination, benefits will be provided by your municipal government. The determination will be made after an examination of causal factors is conducted by the National Board for Certification of Diseases and Disabilities, composed of experts in immunization, infectious diseases, medical care, and law.

While some people decide to receive the vaccine, other do not. Even after your child has been vaccinated, continue to take preventive measures against infection, such as thoroughly washing and disinfecting your hands, as well as wearing masks.

Avoid crowded areas

Avoid close-contact situations

Avoid enclosed spaces

Wear a mask

Wash your hands with soap

Disinfect your hands

For more information on the safety and efficacy of COVID-19 vaccines for children, please visit the Ministry of Health, Labour and Welfare's official website.

If you cannot access the Ministry of Health, Labour and Welfare's official website, please contact your local municipality or city hall.

MHLW Corona Vaccine Child Search

Page 4

For people, for life, for the future

Ministry of Health, Labour and Welfare

February 10<sup>th</sup>, 2022

### For Children Aged 5 to 11

#### What You Should Know About the COVID-19 Vaccine

#### Why should I take the COVID-19 vaccine?

When people catch the COVID-19 virus, it can make them sick with a fever, cough, and headaches. It can make them feel tired, make it hard to breathe, and even make it hard to taste and smell!

If you take the COVID-19 vaccine, it helps your body get ready to fight the virus. That way, you won't feel sick even if you are infected with the virus.

#### What should I do before I get my COVID-19 vaccine?

|                         |                                                                                                                                                                                                                                                                                                                                                                                                                                                                                                                                                                                      |
|-------------------------|--------------------------------------------------------------------------------------------------------------------------------------------------------------------------------------------------------------------------------------------------------------------------------------------------------------------------------------------------------------------------------------------------------------------------------------------------------------------------------------------------------------------------------------------------------------------------------------|
| Before the doctor visit | You can't take the vaccine if you have a fever of 37.5°C (99.5°F) or more. So if you don't feel good, let your family know.                                                                                                                                                                                                                                                                                                                                                                                                                                                          |
| At the doctor visit     | The doctor will give you a shot in the shoulder. So be sure to wear a T-shirt or a shirt with sleeves you can roll up!                                                                                                                                                                                                                                                                                                                                                                                                                                                               |
| After the doctor visit  | <p>© After you get your shot, please sit down and wait for 15 -30 minutes. Let someone know if you start feeling bad.</p> <p>© After your shot, you can spend your day as usual. It's okay to take a bath or shower! Just don't play or exercise too hard.</p> <p>© Sometimes the shot makes people feel sick. If that happens, it will usually go away in 2 or 3 days. You might:</p> <ul style="list-style-type: none"> <li>- Feel hot (fever)</li> <li>- Feel tired</li> <li>- Feel sick</li> <li>- Feel cold</li> <li>- Have a stomachache</li> <li>- Have a headache</li> </ul> |

#### Be sure to let your family and loved ones know right away if you feel any of these things:

© Right after your shot

- Feeling itchy

- Coughing

© Up to 4 days after your shot

- Fever

- Headache

- Chest pain

- Trouble breathing

- Feeling tired

- Feeling cold

- Feeling your heart beating very fast

**You'll need to get 2 vaccine shots with 3 weeks in between.**

#### Something That's Important to Remember

The world is full of different people. Some get their vaccine early, and some decide not to get a vaccine at all. Everyone has their reasons. What is important is not to bully or make fun of your friends and classmates, whether they get the vaccine or not!

**February 2022 Edition****Prepared using information as of February 18<sup>th</sup>, 2022****Bunkyo Ward****For Children Aged 5 to 11 years and Their Parents or Guardians**

\* This information is being sent to children who are between the ages of 4 years and 11 months and 11 years and 10 months as of February 2022.

Another mailing will be sent to children who will turn 12 years this month or are 11 years and 11 months old.

**Starting March 2022, children (5-11 years old) will be eligible to receive the COVID-19 vaccine.**

Please review this information with your child.

**What You Need to Know about the COVID-19 Vaccine**

**A "Vaccination Ticket (sticker)" and "Preliminary Examination Form (2 pages)" are enclosed.**

Beginning in March, children aged 5-11 years can receive the first and second doses of the COVID-19 vaccine.

**Vaccination Overview**

Who? **For children (5-11 years old)**

Cost **Free**

Vaccine Type **For children (5-11 years old)**

**COVID-19 Vaccine (Manufactured by Pfizer for children)**

\* The same Pfizer vaccine is being offered to children aged 5-11 years and adolescents over 12 years old; however, the amount of active ingredients is different.

No. of Doses **2 Doses**

**(After receiving the first dose, please receive the second dose three weeks later.)**

\* The second dose can be received even if the 3-week waiting period has passed.

If more than 3 weeks have passed since the first dose, the second dose should be received as soon as possible.

The enclosed vaccination ticket and preliminary examination form **can be used even after the child reaches the age of 12 years!**

The enclosed vaccination tickets and preliminary examination forms for the first and second vaccinations **can also be used for children who will receive vaccinations after turning 12 years old.**

\* New vaccination tickets or preliminary examination forms will not be sent to children after turning 12. If you lose your vaccination tickets, you will need to apply to have them reissued. For details, please refer to the Bunkyo Ward website.

**The "Vaccination Process" is described on the following pages.**

For Reservations

**Bunkyo Ward COVID-19 Vaccination Call Center**

---

03 (6747)4593

9am - 8pm daily

\* Please be careful not to dial the wrong number.

## COVID-19 Vaccination Process for Children (5-11 years old)

### 1) Review the following items prior to vaccination

#### Differences between types of vaccines

The amount of active ingredients in the vaccine given to children under 11 years differs from the amount given to those over 12 years old!

Since the type of vaccine received is based on the child's age at the first dose, if your child turns 12 years old during the interval between their first and second dose, **their second dose will still be the vaccine for children 5-11 years of age.**

\* Starting on the day before their 12th birthday, children will be vaccinated with the COVID-19 vaccine for children 12+ years.

| First Dose              |                                       | Second Dose             |                                       |
|-------------------------|---------------------------------------|-------------------------|---------------------------------------|
| Age at vaccination date | Vaccine used                          | Age at vaccination date | Vaccine used                          |
| 11 years old            | Vaccine for children (5-11 years old) | 12 years old            | Vaccine for children (5-11 years old) |

Details about the vaccine (efficacy, safety, etc.)

For details, please refer to the enclosed leaflet, the vaccine instructions, and visit the Ministry of Health, Labour and Welfare website.

Ministry of Health, Labour and Welfare  
Website

### 2) Check Appointment Schedule and Vaccination Sites

For the latest information, please visit the Bunkyo Ward website.

-- The COVID-19 vaccine and other vaccines **cannot be given at the same time.**

Please wait at least **2 weeks before taking other vaccines.**

In addition, **please refrain from receiving other vaccinations between the first and second dose of the COVID-19 vaccine.**

-- After the first dose, **the second dose is usually taken 3 weeks later.**

\* For reservations for vaccination at a group vaccination site, **appointments for the first and second dose will be made as a set.**

Furthermore, **the appointment for the second dose will be 3 weeks after the first dose, at the same place and time.**

**First vaccination [for children 5-11 years old on the date of the first dose]**

| Location                                                                                                                                                                                                      | Reservation Start Date                                                     | First Dose in March                                                                                                                                                                                                                                                                                  |
|---------------------------------------------------------------------------------------------------------------------------------------------------------------------------------------------------------------|----------------------------------------------------------------------------|------------------------------------------------------------------------------------------------------------------------------------------------------------------------------------------------------------------------------------------------------------------------------------------------------|
| <b>Group Vaccination Site</b><br>- Health Service Center<br>(Civic Center, 3rd Floor, 1-16-21 Kasuga, Bunkyo-ku, Tokyo)<br><br>- Health Service Center<br>Hongo Branch<br>(5-20-18 Sendagi, Bunkyo-ku, Tokyo) | <b><u>March 7th, 2022 (Monday)</u></b><br><b><u>Starting at 9:00am</u></b> | <b><u>March 12th, 2022 (Saturday)</u></b><br><br><b>March 13th (Sun)</b><br><b>March 19th (Sat)</b><br><b>March 20th (Sun)</b><br><b>March 26th (Sat)</b><br><b>March 27th (Sun)</b><br><br>*The Hongo branch office of the Health Service Center will be open everyday except Saturday, March 19th. |

|                                    |                                           |                                                            |
|------------------------------------|-------------------------------------------|------------------------------------------------------------|
|                                    |                                           | * The vaccination dates for April are still being decided. |
| <b>Individual Vaccination Site</b> | <b>To be decided (as of February 18)*</b> |                                                            |

\*The individual vaccination sites are still being decided as of February 18th; however, there is a possibility that reservations and vaccinations will begin earlier than at the group vaccination sites. Please refer to the Bunkyo Ward website for the latest information.

**First Vaccination [for children 12+ years old on the date of the 1<sup>st</sup> dose]**

| Location                                                                                          | Reservation Start Date                                 | First vaccination date                                                     |
|---------------------------------------------------------------------------------------------------|--------------------------------------------------------|----------------------------------------------------------------------------|
| <b>Group Vaccination Site</b><br>• Bunkyo Civic Center, 25th floor<br>(1-16-21 Kasuga, Bunkyo-ku) | <b><u>Currently accepting applications</u></b>         | March 11th, 2022 (Fri)<br>March 12th, 2022 (Sat)<br>March 25th, 2022 (Fri) |
| <b>Individual Vaccination Site</b>                                                                | <b>Applications are not currently being accepted.*</b> |                                                                            |

\* Individual vaccination sites may open up for registration at some point (please refer to the Bunkyo Ward website for the latest information).

### 3) Making a Reservation

#### (1) If you wish to make a reservation for a **group vaccination**

If it is difficult for you to complete these procedures on your own, regional activity centers are available to assist you in making a reservation. (9am to 5pm, except weekends and holidays)

Making a reservation by phone

**03 (6747) 4593\*** (9am to 8pm)

**\* Please be careful not to dial the wrong number.**

OR

Making a reservation through the COVID-19 Vaccination Reservation Website

**Bunkyo Ward Reservation Site QR code**

#### (2) If you wish to make a reservation for an **individual vaccination**

Please contact one of the designated medical institutions in the ward to make an appointment (see the Bunkyo Ward website for details).

### 4) Things to Remember on the Day of Your Vaccination

A "vaccination ticket (sticker)" and a "preliminary examination form" are enclosed along with this pamphlet.

Please do not remove the sticker from the vaccination ticket.

To Bring

- ☐ Vaccination ticket (sticker)
- ☐ Identification documents for children receiving vaccination (My Number Card, health insurance card, etc.)
- ☐ Preliminary examination form
- ☐ Maternal and Child Health Handbook (to check the vaccination history of your child and record the COVID-19 vaccination)

Body Temperature Measurements

If your child's **temperature is 37.5°C or higher**, or if **he/she is sick**, please **refrain from receiving the vaccination and follow the appointment cancellation procedures.**

#### ① Cancelling a group vaccination appointment

Please contact the call center (03 (6747) 4593).

Please refrain from contacting the vaccination sites directly.

#### ② Cancelling an individual vaccination appointment

Please contact the medical institution where you made your appointment.

For parents/guardians of children under 16 years of age

**The consent of a parent/guardian is required. Additionally, parents/guardians are required to accompany their children to the vaccination.**

**A parent or guardian must accompany the child on the day of vaccination.**

Vaccinations will not be administered without parental consent.

**\*If for some reason you are unable to accompany your child, a family member or relative may do so as a proxy.** Please refer to the Bunkyo Ward website for the proxy form.

**A parent or guardian's signature is required on the preliminary examination form.**

**The preliminary examination form must be signed by a parent or guardian** for vaccination.

**\* If the preliminary examination form is not signed by a parent/guardian, vaccination will not be administered.**

## Pediatric COVID-19 Vaccine Q&amp;A

More Details Available Here [QR code]

**5) Q&A About the COVID-19 Vaccination for Children (Ages 5-11 years)****Q: What are the side effects of vaccination for children (5-11 years old)?**

A: As with children 12+ years old, various side effects such as pain at the injection site, fatigue, headache, and fever have been observed; however, most are mild or moderate in severity and easily recovered from. **Based on the information available at this time, no serious safety concerns have been identified.**

**Q: How many children (5-11 years old) are being vaccinated in other countries?**

A: Vaccination is already underway in many countries. Several nations, including the US, are recommending that children be vaccinated.

**Q: How effective is the vaccination for children (5-11 years old)?**

A: Pfizer's vaccine has been shown to increase levels of neutralizing antibodies and be effective in preventing COVID-19 symptoms in children aged 5-11 years, including against the Delta variant and other strains.

**Q: What do I need for the vaccination?**

A: As a rule, children aged 5-11 years must be accompanied by a parent or guardian for vaccination. In addition, **because vaccination history of children under school age is recorded in the Maternal and Child Health Handbook, if possible, please bring the handbook with you on the day of the vaccination.**

**Q: Is there anything parents should be concerned about when vaccinating children (5-11 years old)?**

A: For the first few days after vaccination, you should watch for a variety of medical conditions. Furthermore, **because the vaccine is not 100% effective, we ask that you continue to take basic precautions against infection, such as wearing masks.**

We ask you to prevent your child from discriminating or bullying other children in school about whether or not they have received COVID-19 vaccination.

**Q: Is the dose and frequency of the vaccination the same as for adults?**

A: The amount of active ingredient in the COVID-19 vaccine for children aged 5-11 years is 1/3 of the amount administered to children aged 12 years and older.

The number of doses is the same as for children aged 12 years and older: 2 doses spaced over a 3-week interval.

Source: "COVID-19 Vaccine Q&A," Ministry of Health, Labour and Welfare

For more information on the safety and efficacy of COVID-19 vaccines for children, please visit the Ministry of Health, Labour and Welfare's official website.

MHLW COVID-19 Vaccine Children

Search

**<For Parents and Guardians of Children Aged 5 to 11 years>  
Instructions for COVID-19 Vaccination  
(Vaccinations for Children Aged 5 to 11 years)**

For Pfizer Vaccine (for ages 5-11 years) (March 2022)

**To the parents and guardians of children aged 5 to 11 years old, who are now eligible for COVID-19 vaccination:**

- ◎ **Parents/Guardians must provide consent and accompany their child** during the vaccination process.
- ◎ **If your child is to be vaccinated, a parent or guardian must sign his or her name in the signature space on the pre-examination slip.** If you are not requesting a vaccination for your child, please do not write anything in the signature space. **Children will not be vaccinated unless a parent or guardian signs the pre-examination slip.**
- ◎ If you have any questions or concerns about the vaccine, please first read and consider information from national or local authorities, or consult with your family doctor and/or healthcare provider before making any decisions.

**About the COVID-19 Vaccination**

This vaccination effort is part of the COVID-19 (SARS-CoV-2) vaccination project being conducted by the national and local governments of Japan. The vaccination effort is publicly funded and therefore free of charge for those who wish to be vaccinated. This vaccine in particular is intended for children aged 5 to 11 years old.

**Vaccine Effectiveness and Administration Method**

The vaccine that will be administered is manufactured by Pfizer. It protects against the onset of COVID-19 infection. It has been demonstrated that children who receive this vaccination have increased levels of SARS-CoV-2 neutralizing antibodies, just as in persons aged 12 years and over. It has also been found that when compared to unvaccinated people, fewer vaccinated people develop COVID-19 infection. (The efficacy of this vaccine in protecting against the Delta variant and other strains of COVID-19 are reported to be 90.7%.)

Brand Name: Comirnaty Intramuscular Injection for Ages 5 to 11 years

Benefits and Effects: Prevention of SARS-CoV-2 infection

Number of Injections and Interval: 2 Injections (normally 3 weeks apart) \*intramuscular injection

Vaccination Eligibility: Children aged 5 to 11 years

Vaccination Dosage: 2 doses of 0.2ml each \*The amount of active ingredients in each dose is 10µg (1/3 the dose administered to those aged 12 years and over)

- Following the first dose, the second dose should be administered 3 weeks later. (If more than 3 weeks have passed since the 1st dose, please receive the 2nd dose as soon as possible)
- This vaccine provides effective immunity approximately 7 days after administration of the 2nd dose. Moreover, it cannot provide total protection against infection. In addition to receiving the vaccine, it is necessary to continue to take appropriate measures against infection.

**Ineligibility for Vaccination**

Persons with any of the following conditions are not eligible for vaccination. If you think any of these conditions apply, be sure to inform your doctor during the medical examination prior to vaccination.

- Persons with an obvious fever <sup>(\*)</sup>
- Persons suffering from a serious acute illness
- Persons with a history of severe hypersensitivity to the ingredients of this vaccine <sup>(\*)</sup>
- Persons with conditions other than those listed above for whom it is inappropriate to receive a vaccination

<sup>(\*)</sup> Obvious fever is typically defined as 37.5°C or higher. However, temperatures lower than 37.5°C may still be considered obvious fever if they are higher than normal body temperature.

<sup>(\*)</sup> This includes anaphylaxis, or various symptoms indicative of anaphylaxis, such as generalized skin and mucous membrane symptoms, wheezing, labored breathing, tachycardia, and low blood pressure.

**Persons Required to take Extra Precautions when Undergoing Vaccination**

Persons to whom the following conditions apply should take extra precautions regarding vaccination. If you think any of the following conditions apply, be sure to inform your doctor during the medical examination prior to vaccination.

- Persons receiving anticoagulation therapy, as well as persons with thrombocytopenia or coagulation disorders

- Persons who have been diagnosed with immunodeficiency disorders at any time in the past or have close relatives with congenital immunodeficiency disorders
- Persons with blood diseases, developmental disorders, and/or underlying heart, kidney, or liver conditions
- Persons who had allergic reactions, such as fever and generalized rash, within the 2 days following past vaccinations
- Persons who have had convulsions at any time in the past
- Persons who may be allergic to any of the ingredients of this vaccine <sup>(\*)</sup>

<sup>(\*)</sup> Persons who have had hypersensitivity or an allergic reaction to medication in the past should inform their doctor during a medical examination prior to vaccination.

**(Continued on the back)**

### **Considerations Following Vaccination**

- Please wait for at least 15 minutes at the facility once you have received the vaccine. Alert a physician immediately if you feel unwell. (Persons with a history of severe allergic symptoms, including anaphylaxis, as well as persons who feel sick or have fainted, should wait for at least 30 minutes. In this way, any sudden adverse reactions can be attended to.)
- The injected area should be kept clean. It is fine to bathe after receiving the injection; however, please avoid rubbing the injected area. In addition, persons feeling unwell after vaccination should rest, refrain from bathing, and monitor their condition.
- It is fine to continue with the activities of daily life; however, please refrain from strenuous exercise on the day of the procedure.

### **Side Effects**

- Generally, side effects can include pain in the injected area, headache, joint and muscle pain, fatigue, chills, and fever. In addition, though rare, major adverse reactions include shock and anaphylaxis. As this vaccine is a new type of vaccine, it is possible that previously unidentified symptoms will occur. In the event of concerning symptoms following vaccination, please contact the administering physician or your family doctor.
- Though extremely rare, cases of suspected myocarditis and pericarditis have been reported following vaccination <sup>(\*)</sup>. If you experience symptoms such as chest pain, heart palpitations, shortness of breath, or swelling in the days following vaccination, seek immediate medical attention.

<sup>(\*)</sup> In the United States, myocarditis has been reported less frequently among boys aged 5 to 11 years than those aged 12 to 17 years.

### **About the Relief System for Injury to Health with Vaccination**

Vaccination can adversely impact health (by causing illness or disability). A relief system has been established because these events, though extremely rare, cannot be completely avoided.

In case your health has been adversely impacted by the COVID-19 vaccine, relief (medical expenses, disability pension benefits, etc.) is available under the Immunization Act. Please consult with the municipality in which you reside regarding the necessary procedures for application.

### **About COVID-19 Infection**

When SARS-CoV-2 infection occurs, symptoms similar to those of the common cold, such as fever and cough, are seen. While many people recover from the disease with only mild symptoms, in severe cases, symptoms of pneumonia, such as breathing difficulties, worsen, and may even lead to death.

### **Characteristics of this COVID-19 Vaccine (Manufactured by Pfizer for ages 5 to 11 years)**

This drug is a "messenger RNA" (mRNA) vaccine. This means that it is a formulation in which the mRNA, which contains the blueprint for the spike protein of SARS-CoV-2 (a protein necessary for the virus to enter human cells), is encased in a lipid membrane. When mRNA is taken up into human cells by inoculation with this drug, the mRNA

facilitates the production of viral spike proteins, which in turn induces the production of neutralizing antibodies and cellular immune responses against the spike protein. This immune response is believed to prevent infection by SARS-CoV-2. (This is the same mechanism as that of the vaccine used for those aged 12 years and over.)

This drug contains the following ingredients:

**Active Ingredient:**

Tozinameran (mRNA encoding the full-length spike protein that binds to the human cell membrane)

**Additives:**

ALC-0315: [(4-hydroxybutyl)azanediyl]bis(hexan-6,1-diyl)bis(2-hexyldecanoate)

ALC-0159: 2-[(polyethylene glycol)-2000]-N,N-ditetradecylacetamide

DSPC: 1,2-distearoyl-sn-glycero-3-phosphocholine

Cholesterol

Purified sucrose

Trometamol

Trometamol hydrochloride

**For more information on the COVID-19 vaccine, please visit the Ministry of Health, Labour and Welfare website.**

MHLW COVID-19 Vaccine

Search

If you cannot access the website, please contact your local municipality.
