# Supplementary material for: In Whose Best Interest? Parental Hesitancy toward the COVID-19 Vaccine for Children in Japan: A Literature Survey Study
Source: MDPI journal article supplement (doi:10.3390/covid2070060), 2022-06-23
Supplement: s1 [file s1 › Supplimentary File S2 (literature list).xlsx]

## Sheet: Sheet1
Reference Number	Author	Language	Published Date	Medium	Title	Description	URL
1	NHK (Nippon Hoso Kyokai) Japanese Broadcasting System	Japanese	2022-03-18	News	The reason the number of infected people of the new coronavirus “6th wave” has not decreased enough. What are the perspectives?	Experts explains the reason for the sixth wave of COVID-19 cases not ceasing is due to the elderly population not getting their third shot and cases among children are increasing.	https://www3.nhk.or.jp/news/html/20220318/k10013539421000.html
2	Tsukumori, O.	English	2022-02-16	Newspaper	Despite Ministry Recommendation, Some Parents in Japan Wary of COVID Jabs for Children.	Although the vaccine has become available for children, some parents are skeptical about the information provided by the government.	https://www.japantimes.co.jp/news/2022/02/16/national/science-health/vaccinations-young-children-parents-wary/
3	Prime Minster's Office	Japanese	2022-06-13	Government Website	Vaccination rates according to age.	Vaccination rates for different age groups. For ages 5–11, 16.6% for the first shot and 14% for the second shot.	nenreikaikyubetsu-vaccination_data.pdf
4	National Center for Child Health and Development	Japanese	2022-11-17	Government Website	Corona x Children's Questionnaire 6th Survey Report.	A survey of 1,271 children and 5,807 parents on psychological stress and vaccination.	https://www.ncchd.go.jp/center/activity/covid19_kodomo/report/finreport_06.html
5	Marti, M.; De Cola, M.; MacDonald, M,; Dumolard, L.; and Duclos, P.	English	2017-03-01	Journal	Assessments of Global Drivers of Vaccine Hesitancy in 2014—Looking beyond Safety Concerns.	Globally, vaccine hesitancy has been seen as a concern. Twenty-nine percent of the countries have conducted assessments on the level of confidence people have in vaccines.	https://pubmed.ncbi.nlm.nih.gov/28249006
6	Ministry of Health, Labor and Welfare	Japanese	2021-07-17	Governmental Website	New Corona Vaccination Guide for Children	Brochure made by MHLW for children 12 years and above.	https://www.mhlw.go.jp/content/000805690.pdf
7	Not indicated	Japanese	2022-03-11	Newspaper	A Preschooler with COVID Died, the Second Case in Japan	A preschooler with no underlying conditions dies of COVID-19.	https://yomidr.yomiuri.co.jp/article/20220310-OYT1T50369/
8	Moriuchi, H.	Japanese	2022-03-15	Government Meeting	Considering the Novel Corona Virus Infection from a Pediatrician’s Point of View.	A pediatrician's presentation on COVID-19 data on children. Severity and fatality in comparison to flu. Mental conditions of children post the pandemic.	https://www.mhlw.go.jp/content/10900000/000913249.pdf
9	Japan Pediatric Society	Japanese	2022-03-28	Pediatric Society	The Third Interim Report on the Clinical Outcomes of COVID-19 Pediatric Patients in Japan. Changes in Clinical Cases with the Omicron Variant.	The report indicates that there were no changes in the severity of COVID-19 cases with Omicron variants. There was an increase in symptoms such as fever, seizures, vomiting, and laryngeal pain.	www.jpeds.or.jp/uploads/files/20220328_tyukan_hokoku3.pdf
10	American Academy of Pediatrics and the Children’s Hospital Association	English	2022-02-24	Pediatric Society	Children and COVID-19: State Data Report	Joint data (American Academy of Pediatrics and The Children's Hospital Association) on COVID-19 cases of children in the United States.	https://downloads.aap.org/AAP/PDF/AAP%20and%20CHA%20-%20Children%20and%20COVID-19%20State%20Data%20Report%202.24.22%20FINAL.pdf
11	Tachibanaki, T.	English	2021-02-05	Blog (educational)	Increasing Indifference to Japan ’s Education Inequality	The right to quality higher education tends to be hereditary, as national government offices are filled with University of Tokyo graduates whose own children move from famous prep schools to that same university.	https://www.nippon.com/en/in-depth/d00659/
12	Fraser, J.	English	2020-10-28	Blog (educational)	The Impact of COVID-19 on Education Inequality in Japan	The COVID-19 pandemic has intensified educational disparity and put students from low-income families below the poverty line.	https://www.csis.org/blogs/new-perspectives-asia/impact-covid-19-education-inequality-japan
13	Yamamoto, S.	English	2021-06-16	News	Coronavirus crisis shows Japan lagging in online education	Although Japan was quick to close all schools, they were not ready for online education.	https://www3.nhk.or.jp/nhkworld/en/news/backstories/1137/
14	Morigami T.	Japanese	2022-03-24	Blog (educational)	2022 Metropolitan Area Private Junior High School Candidate Trend Analysis-Characteristics of the Year	Cram schools for junior high school students preparing for entrance exams are packed in metropolitan Tokyo. 2022 entrance exam rates are higher than ever.	https://benesse.jp/juken/202203/20220324-1.html
15	Cocoreco	Japanese	2022-05-07	Blog (educational)	More than 60% of moms experience ‘children don’t want to go to school.’ What actions should parents take?	A web survey of 108 mothers who are readers of AnyMaMa during the period February 2021–February 2022 showed that more than 60% of mothers experienced their child not wanting to attend school. The pandemic was one of the reasons.	https://cocreco.kodansha.co.jp/general/topics/housework/labo/UmVXw
16	Zhang, M.	English	nd (not dated)	Blog (educational)	Japanese Parenting: Styles, Culture, and Comparisons	Japanese parenting styles tend to differ in various ways from traditional Western parenting styles. The predominant relationship for a Japanese child is with his or her mother, which is carefully nurtured from infancy.	https://www.familylifeshare.com/japanese-parenting/
17	NHK (Nippon Hoso Kyokai) Japanese Broadcasting System	Japanese	2021-08-27	News	Child Abuse Record High Last Year ‘Over 200,000’: A Summary by the Ministry of Health, Labor, and Welfare.	Child abuse cases have increased due to families being isolated and close monitoring has been hindered by the pandemic.	https://www3.nhk.or.jp/news/html/20210827/k10013226101000.html.
18	Lee, C.	English	2021-09-13	Blog (educational)	Japanese Schools Must Intervene More Effectively in Bullying Problems	Japanese school children have the second worst mental health out of 32 countries. Bullying is the leading cause of child suicide.	https://zenbird.media/japanese-schools-must-intervine-more-effectively-in-bullying-problems/
19	NHK (Nippon Hoso Kyokai) Japanese Broadcasting System	Japanese	2020-10-22	News	According to Data, Bullying, School Refusal, Violence in School, are the Highest Ever for the Younger Age Group.	Japanese society and parents increasingly pressure children to succeed, especially in the younger age group. Parents need to focus more on improvement, not just punching out numbers.	https://www3.nhk.or.jp/news/html/20201022/k10012676031000.html
20	Kawano, K.	English	2021-05-07	Blog (educational)	Bullying in Japanese Schools. Modern Bullying Attacks Not Just The Odd Ones Out.	Every child is a potential victim of modern bullying in Japan. Recent increased efforts by educational institutions to resolve and eradicate the harassment, such as the ijime protection law (passed in 2013), offer some hope.	https://savvytokyo.com/bullying-japanese-schools/#:~:text=Bullying%20in%20Japanese%20schools%2C%20or%20ijime%2C%20is%20an,than%209%2C000%20children%20it%20surveyed%20had%20been%20bullied
21	Watanabe, A.	Japanese	2020-11-11	Blog (educational)	Online lessons are the catalyst for attending school! The changes online lessons brought to school refusal students.	Online learning ensures education for children who refuse to go to school. The meaning of "school attendance" has changed with COVID and online schooling.	https://benesse.jp/kyouiku/202011/20201111-1.html
22	Eguchi, Y.	Japanese	2021-10-13	Government Website	Summary of survey results on issues related to student guidance such as problem behaviors and school refusal of R2 children	Bullying decreased by 15.6% and school violence decreased by 16% in 2020, compared to the previous year. However, refusal to attend school increased by 8.2% and the number of students quitting school and committing suicide increased.
23	NHK (Nippon Hoso Kyokai) Japanese Broadcasting System	Japanese	2021-10-13	News	More than 400 child suicides, the highest ever. The number of students refusing to go to school is more than 190,000, the highest ever.	The number of cases of suicide and school refusal has increased. Although the reason for suicide is unclear, specialists indicate that children feel lost about their place in society, feel studying is tiresome, and face significant psychological pressure to succeed academically.	https://www3.nhk.or.jp/news/html/20211013/k10013305371000.html
24	NHK (Nippon Hoso Kyokai) Japanese Broadcasting System	Japanese	2021-12-17	News	The highest number of school refusals due to Corona-ka. Children and parents are driven into a corner.	Even though the number of COVID-19 cases has decreased, children are still feeling cornered by the effects of the pandemic. The limitations placed on school activities and interactions amongst students are causes of school refusal. In addition, these children suffer cruel criticisms through SNS, which impact the entire family.	https://www3.nhk.or.jp/news/html/20211217/k10013362471000.html.
25	Ministry of Education, Culture, Sports, Science and Technology	Japanese	2021-05-07	Government Website	About the current situation regarding suicide of children and students in Corona-ka	The number of suicides among school-aged children increased by 100 in 2020, compared to 2019 and was more prominent for females. With the pandemic, many children are anxious about the uncertainties surrounding the resumption of school activities.	https://www.mext.go.jp/content/20210507-000014796-mxt_jidou02_006.pdf
26	National Center for Child Health and Development	Japanese	2022-03-23	Government Website	Report of the 7th Survey. Digest Version	The result of an internet survey of 3,769 children and parents. As children and parents experience stress due to the limitations from the pandemic, they are showing signs of depression, although many do not seek medical consultation.	https://www.ncchd.go.jp/center/activity/covid19_kodomo/report/CxC7_digest.pdf
27	Shizuoka Shimbun	Japanese	2022-04-20	Newspaper	Accidental inoculation of coronavirus vaccine to a 5-year-old boy. Gifu and Japanese encephalitis at the same time.	A 5-year-old boy in Gifu visiting to receive the Japanese encephalitis (JE) vaccine was accidentally inoculated with the COVID-19 vaccine at the same time. Although the nurse handed him the JE voucher, the physician misunderstood that he should receive the COVID-19 vaccine.	https://www.at-s.com/news/article/national/1056199.html
28	Yomiuri Shimbun Online	Japanese	2022-03-23	Newspaper	Vaccination mistakenly used for children under 12 years old ... The difference was not confirmed between adult and pediatric use	A child under 12 years of age in Nagasaki was administered the adult dose of the COVID-19 vaccine. The medical staff did not confirm the different dosages for adult and child use.	https://www.yomiuri.co.jp/national/20220327-OYT1T50147/?msclkid=0145fdbec1d311ec9ec1126ac85c5e3c
29	Sakamoto, M.	Japanese	2021-04-21	News	My child can’t get vaccinated! The Shortage of Japanese encephalitis and mumps vaccines. Parents needn’t rush to respond.	While COVID-19 vaccines are being administered, there is a shortage of Japanese encephalitis and mumps vaccines for children due to contamination during manufacturing. Parents need not panic, but re-confirm the window period of these vaccinations.	https://news.yahoo.co.jp/byline/sakamotomasahiko/20210421-00233679
30	WHO (World Health Organization)	English	nd	Blog (educational)	Mumps Reported Cases and Incidence	There were only 8,073 cases of mumps in 2020, but rates have fluctuated over the years and 159,031 cases were seen 2016.	https://immunizationdata.who.int/pages/incidence/MUMPS.html?CODE=JPN&YEAR=
31	Marlow, M.; Haber, P.; Hickman, C.; Patel, M.	English	nd	Government Website	Mumps	The clinical features, pathogenesis, epidemiology, vaccine schedule and precautions for mumps.	https://www.cdc.gov/vaccines/pubs/pinkbook/mumps.html
32	WHO (World Health Organization)	English	2019-05-09	Government Website	Japanese Encephalitis	Although symptomatic Japanese encephalitis (JE) is rare, the case-fatality rate among those with encephalitis can be as high as 30%. Safe and effective vaccination is available.	https://www.who.int/news-room/fact-sheets/detail/japanese-encephalitis
33	Katoh, S.; Obayashi. T.; Ganesh, J.S.; Iwasaki, M.; Preethy, S.; Abraham, S.J.	English	2020-04-20	Journal	Cross-Protection Induced by Encephalitis Vaccines against COVID-19 Might be a Reason for Relatively Lower Mortality Rate in Some Countries	How cross-protection against COVID-19 conferred by the encephalitis vaccine could be the reason for lower fatality rates in countries where immunization against encephalitis is widespread or included in national programs.	https://pubmed.ncbi.nlm.nih.gov/32440665/
34	Japan Pediatric Society	Japanese	2022-03-16	Pediatric Society	Opinion of the Japanese Pediatric Society on Vaccinating Children 5-11 years of age	Describes the epidemiology of COVID-19 cases in children in Japan and acknowledges the benefit of the vaccine to children 5-11 years of age.	http://www.jpeds.or.jp/uploads/files/20220328_corona5-11.pdf
35	Sankei News	Japanese	2022-03-13	News	[Vaccination against the novel coronavirus for ages 5–11: 32.8% of parents ‘have never talked’ about vaccination with their children.	Results of an internet survey of parents (90 male and 90 female) with children 5–11 years of age indicate that 32.8% of them have never discussed the vaccine with their children.	https://www.sankei.com/economy/news/220316/prl2203160019-n1.html
36	Hori, H.; Ohta, A.; Matsui, H. et al.	English	2021-10-01	Journal	Changes of cancer diagnosis disclosure to children in Japan in the last 20 years	The ratio of pediatric oncologists having the policy to proactively perform diagnosis disclosure increased from 9.3% to 60.0%, while that of parents having the same policy hovered at 5.3%.
37	Rothbaum, F.; Kakinuma, M.; Nagaoka, R.; Azuma, H.	English	2007-07-01	Journal	​​Attachment and Amae: Parent–Child Closeness in the United States and Japan	In mildly stressful situations, Japanese mothers more often attribute the child's inappropriate behavior to needs for security and interdependence than to egotism and self-maximization.	https://doi.org/10.1177/0022022107302315
38	World Economic Forum	English	2021-03-30	Blog (educational)	Global Gender Gap Report 2021	As the impact of the COVID-19 pandemic continues to be felt, closing the global gender gap has increased by a generation: from 99.5 years to 135.6.	https://www.weforum.org/reports/global-gender-gap-report-2021/digest
39	Cahn, N.	English	2022-03-31	Blog (educational)	Updates On The Gendered Wage Gap and COVID-19	The decrease in the gender gap is only on surface level. The pandemic has produced more stress and setbacks for women because they were in more vulnerable positions and their caregiving time—for children and for others—has greatly increased.	https://www.forbes.com/sites/naomicahn/2022/03/31/news-on-the-gendered-wage-gap--and-covid-19/?sh=7da15743e4eb
40	Rich, M.; Dooley, B.; Inoue, M.	English	2019-02-02	Newspaper	Japan’s Working Mothers: Record Responsibilities, Little Help From Dads.	Men in Japan do fewer hours of housework and childcare than men in any of the world's richest nations. This keeps women from obtaining better jobs and hinders economic growth.	https://www.nytimes.com/2019/02/02/world/asia/japan-working-mothers.html
41	Hisanaga, Y.; Ishikawa, T.	Japanese	2021-11-11	Newspaper	Working Women Alert: Women’s Suicide Increases by 15%, Employment Decreases due to the Pandemic.	Suicide rates for women increased by 15.4% in 2020. Working women are especially at risk due to a rise in unemployment rates caused by the pandemic.	https://digital.asahi.com/articles/DA3S15099088.html?pn=2&unlock=1#continuehere
42	Okada, M.; Ogikubo, M.; Arai, T.; Kaneko, S.	Japanese	nd	Blog (educational)	In the Heisei Era, the Number of ‘Working Women’ Has Increased, but ... How Easy Is It for Her to Work?	Although the number of working women has increased in the Heisei era, the proportion of women in management positions remains low since it is difficult to balance work and family.	https://www3.nhk.or.jp/news/special/heisei/view-data/view-data_04.html
43	Takahara, A.	English	2022-01-28	Newspaper	Japan to Shorten Isolation Period to Seven Days for COVID Close Contacts	Japan will cut the isolation period for close contacts of anyone who has tested positive for COVID-19 to seven days amid concerns that societal and business activities will be hampered if more people need to be absent from work.	https://www.japantimes.co.jp/news/2022/01/28/national/close-contact-isolation-covid/
44	Horiuchi, S., et. al	English	2021-12-17	Journal	Factors of Parental COVID-19 Vaccine Hesitancy: A Cross Sectional Study in Japan.	People with lower satisfaction with social relationships tend to be more hesitant to vaccinate their child. In contrast to fathers, mothers showed constant intention to vaccinate their child regardless of the level of satisfaction with social relationships.
45	Dresevic, E.	English	2021-04-14	Blog (educational)	The Vaccine against COVID-19 DOES NOT Cause Sterility	There is much misinformation regarding vaccines. Vaccines does not have a long term effect such as infertility.	https://www.unicef.org/montenegro/en/stories/vaccine-against-covid-19-does-not-cause-sterility
46	Aizawa, S.	Japanese	2021-09-03	Government Website	Is it true that you will be infertile? Is it okay even during pregnancy? Explanation of the new coronavirus vaccine (mRNA vaccine) for women.	Information regarding the effects of the COVID-19 vaccine on women's fertility, pregnancy, and lactation and promoting vaccination, especially for pregnant and lactating women.	https://www.cov19-vaccine.mhlw.go.jp/qa/column/0007.html?msclkid=8036cfd4c1f911eca8a7d0a8e8d7cb26
47	WCVB Channel 5 (TV-5, DT-20, Boston, Massachusetts)	English	2021-10-29	News	Boston Children’s Doctor on Parents’ Vaccine Hesitancy for Kids	The results of the Kaiser Foundation study show that 27% of parents say that they will not vaccinate their children. Physicians are hopeful that hesitancy will be similar to that for children over 12—rates gradually increasing over time.	https://www.youtube.com/watch?v=OKpr0G3Votw
48	Savin, J.	English	2022-02-04	Blog	Does the Coronavirus Vaccine Cause Menstrual Irregularities? Expert Commentary.	While reports show COVID-19 vaccination does change menstrual cycles, it is only short term and the vaccine does not cause infertility.	https://www.cosmopolitan.com/jp/beauty-fashion/health/a38977948/vaccine-period-220204-hns/
49	Male, Victoria	English	2021-09-21	Journal	Menstrual Changes after COVID-19 Vaccination.	Information about menstrual cycles and other vaginal bleeding should be actively solicited in future clinical trials and not be taken as aftermath, including trials of COVID-19 vaccines.	https://www.bmj.com/content/374/bmj.n2211
50	Ministry of Health, Labour and Welfare	Japanese	nd	Government Website	Is It True That Vaccination Causes Irregular Bleeding (Abnormal Bleeding) and Irregular Menstruation?	The mRNA vaccine does not directly impact the menstruation cycle.	https://www.cov19-vaccine.mhlw.go.jp/qa/0092.html
51	Shimokawa, H. and Oiwa, Y.	Japanese	2021-06-04	News	Side Effects of the Coronavirus Vaccine. Why Are They so Common in Women? Where Are the Differences between Men and Women?	Women experience the adverse effects of the vaccine more than men, which is attributed to the difference in immunity, hormones, and chromosomes.	https://www.asahi.com/relife/article/14363071
52	University of Pittsburg	English	nd	Blog (educational)	Ie	The ie, or "household," was the basic unit of Japanese law until the end of World War II. Although it was later abolished, its principles are still followed by many Japanese today.	https://www.japanpitt.pitt.edu/glossary/ie
53	The UNESCO Courier	English		Blog (educational)	The Family: Past and Present. Digital Library.	The traditional ie is more of a socio-economic institution than a community linked by blood-relationships. It became the basis of the Japanese nation.	https://unesdoc.unesco.org/ark:/48223/pf0000083386
54	McCabe, C.	English	2020-08-09	Newspaper	Latest Research Points to Children Carrying and Transmitting the Coronavirus	Researchers say new studies and anecdotal reports suggest kids are more vulnerable to the virus than initially suspected.	https://www.wsj.com/articles/latest-research-points-to-children-carrying-transmitting-coronavirus-11596978001
55	Flaherty, S.	English	2021-10-15	Blog (educational)	Children and the Spread of COVID-19: Study Finds Kids to be Potential Spreaders of COVID-19, Emerging Variants.	Study finds kids to be potential spreaders of COVID-19, emerging variants.	https://hms.harvard.edu/news/children-spread-covid-19
56	Ministry of Health, Labour and Welfare	Japanese	nd	Government Website	Influenza Q&A	The clinical features, pathogenesis, epidemiology, and prevention of influenza.	https://www.mhlw.go.jp/bunya/kenkou/kekkaku-kansenshou01/qa.html?msclkid=c57a9947c1fb11ecac6293ec32e3c666
57	Asahi Digital	Japanese	2022-02-27	Newspaper	Prime Minister requests elementary, junior high and high schools nationwide to temporarily close from March 2	Prime Minster Abe declares school closure from March 2 to protect children's health since they are at risk of being infected in school-related clusters.	https://digital.asahi.com/articles/ASN2W652BN2WULFA03L.html?msclkid=05076d7ec1fe11ecaebcdf67686b63fb
58	Rich, M.; Dooley, B.; Inoue, M.	English	2020-02-27	Newspaper	Japan Shocks Parents by Moving to Close All Schools Over Coronavirus.	The country, unlike others, has not experienced a sharp increase in reported cases but is under pressure to act decisively to preserve the Tokyo Olympics. Specialists criticize this decision since children are not as frequently infected and do not present severe symptoms.	https://www.nytimes.com/2020/02/27/world/asia/japan-schools-coronavirus.html?msclkid=77f9e491c1fd11ec9d2820343997017d
59	Kaneko, F.	Japanese	2020-08-15	Video	The World Caught a Cold.	A video of a book reading by a famous Japanese newscaster.	https://www.youtube.com/watch?v=SNk5flfMiKo
60	Takahashi, S.	Japanese	2020-08-15	Book (YOMO publishers)	The World Caught a Cold.	A book for children about COVID-19 from a physician's perspective.
61	Ministry of Education, Culture, Sports, Science and Technology	English	nd	Government Website	Current Status and Issues of Education in Japan	Educational Vision goals to be pursued over the next 10 years are as follows: 1) to cultivate in all children the foundation for independence within society by the time they complete compulsory education, 2) to develop human resources capable of supporting and developing our society and leading the international society.	https://www.mext.go.jp/en/policy/education/lawandplan/title01/detail01/sdetail01/1373809.htm?msclkid=65032e6ac20411ec979936585de8205d
